# Supplementary material for: Interaction of melatonin receptor 1B (MTNR1B) genotype and type of breakfast (protein-enriched v carbohydrate-rich) on postprandial glucose response: a randomised crossover trial.
Source: Research Square preprint supplement (doi:10.21203/rs.3.rs-8678875/v1), 2026-02-13
Supplement: Supplementary file 1 [file 53412704272a9adbd7dcb282.xlsx]

## Sheet: Table 2
	All (54)	CC (n = 19)	CG (n = 20)	GG (n = 15)
Age (years)	33 ± 9	34 ± 10	33 ± 9	33 ± 10
Female (n, %)	43, 80	15, 79	16, 80	12, 80
Ethnicity:
White	35, 65	11, 58	14, 70	10, 67
Mixed	4, 7	1, 5	2, 10	1, 7
Asian	7, 13	3, 16	2, 10	2, 13
Other	3, 6	2, 11	1, 5	0, 0
Not reported	5, 9	2, 11	1, 5	2, 10
Height (m)	1.67 ± 0.09	1.68 ± 0.10	1.68 ± 0.08	1.64 ± 0.08
Weight (kg)	66 ± 12	68 ± 14	66 ± 10	64 ± 12
BMI (kg/m2)	24 ± 3	24 ± 3	24 ± 2	24 ± 3
Chronotype score	55 ± 10	53 ± 10	52 ± 8	60 ± 10*
Fasting glucose (mmol/L)	5.23 ± 0.49	5.02 ± 0.42	5.19 ± 0.52	5.53 ± 0.43*
iAUC CHO (mmol/L/120min)	123 ± 64	109 ± 58	110 ± 46	158 ± 81*
iAUC PRO (mmol/L/120min)	95 ± 53	93 ± 65	96 ± 43	95 ± 50
Melatonin CHO (pg/ml)	25.1 ± 18.3	26.2 ± 16.5	26.5 ± 23.0	21.6 ± 13.0
Melatonin PRO (pg/ml)	24.1 ± 17.6	20.0 ± 13.5	29.5 ± 22.0	22.3 ± 14.9
Table 2. Participant characteristics (n = 54), presented as frequency, percentage or mean ± standard deviation.
* Significantly different to CC and CG. BMI: Body mass index; CHO: Carbohydrate-rich breakfast condition; iAUC: Incremental area under the curve for glucose; PRO: Protein-enriched breakfast condition.
