# Supplementary material for: Interaction of melatonin receptor 1B (MTNR1B) genotype and type of breakfast (protein-enriched v carbohydrate-rich) on postprandial glucose response: a randomised crossover trial.
Source: Research Square preprint supplement (doi:10.21203/rs.3.rs-8678875/v1), 2026-02-13
Supplement: Supplementary file 2 [file 77132bc03e94a780a0746b42.xlsx]

## Sheet: Table 1
	Carbohydrate-rich	Protein-enriched
Energy (kJ)	1577	1577
Energy (kcal)	374	373
Fat (g)	5.7	4.7
of which Saturates (g)	1.1	1
Carbohydrate (g)	64	54
of which Sugars (g)	21	18
Fibre (g)	6.3	5.2
Protein (g)	13	11
added protein (g)	-	15
Salt (g)	0.43	0.44
Table 1. Nutritional composition of carbohydrate-rich and protein-enriched breakfasts per 100g.
